# Supplementary material
Source: Springer Nature journal article supplement (https://www.springermedizin.de/resource/supplementary/12913_2011_2137_MOESM2_ESM.pdf/9529942)

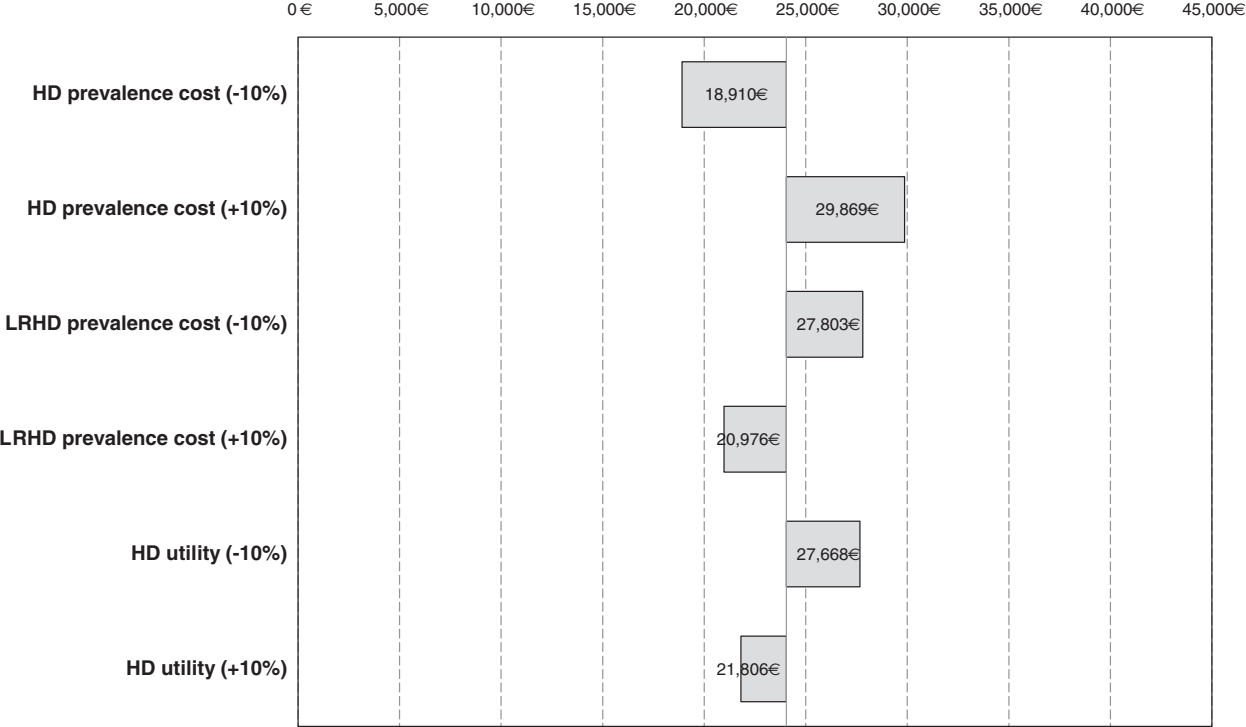

Supplement: MOESM2 [file 9529942]
